# Supplementary material for: Au nanoparticle decorated resin microspheres: synthesis and application in electrochemical cytosensors for sensitive and selective detection of lung cancer A549 cells
Source: Royal Society of Chemistry journal article supplement (doi:10.1039/c5ra00444f), 2015-01-01
Supplement: c5ra00444f1.pdf [file c5ra00444f1.pdf]

## *Supporting Information*

### **Au nanoparticle decorated resin microspheres: Synthesis and application in electrochemical cytosensors for sensitive and selective detection of lung cancer A549 cells**

Wenbo Lu, Hong-Yin Wang, Man Wang, Ying Wang, Lin Tao, Weiping Qian\*

*State Key Laboratory of Bioelectronics, School of Biological Science and Medical Engineering, Southeast University, Nanjing 210096, PR China*

*\*Corresponding author: Tel: (+86)25-83795719; Fax: (+86)25-83795719. E-mail:*

*wqian@seu.edu.cn (W. Qian)*

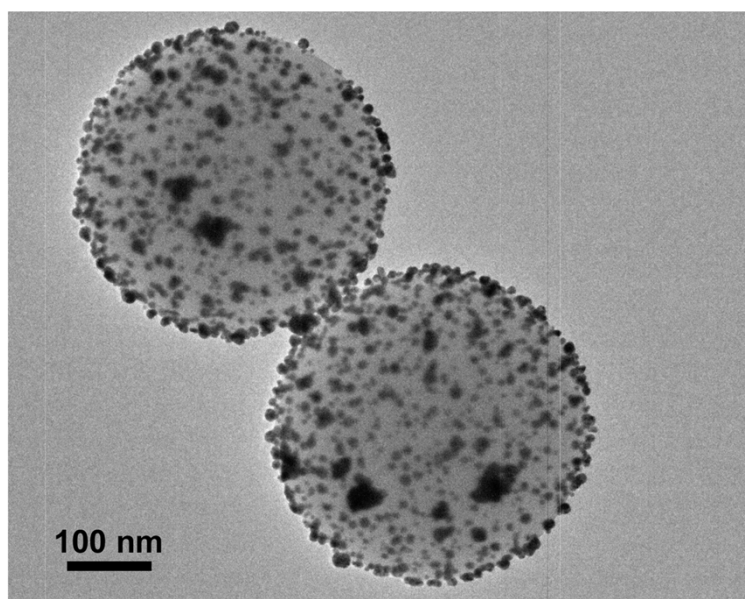

**Figure S1** Typical TEM image of the as-prepared AuNPs/MAPR microspheres.

| <b>Cytosensors</b>                                    | <b>Detection limit<br/>(cells mL<sup>-1</sup>)</b> | <b>References</b>                                                    |
|-------------------------------------------------------|----------------------------------------------------|----------------------------------------------------------------------|
| Electrochemiluminescence                              | 300                                                | <i>Biomacromolecules</i> ,<br>2013, <b>14</b> , 834–840              |
| Surface acoustic wave aptasensor<br>array             | 32                                                 | <i>Biosens. Bioelectron.</i><br>. 2014, <b>60</b> , 318–324          |
| Responsive Enzyme<br>Mimicking/colorimetric detection | 100                                                | <i>ACS Appl. Mater.<br/>Interfaces</i> 2014, <b>6</b> ,<br>6434–6442 |
| Folic acid-modified electrode                         | 10                                                 | <i>Chem. Commun.</i><br>2012, <b>48</b> , 2594–<br>2596              |
| Ag@BSA microspheres/Au<br>electrode                   | 20                                                 | <i>Biosens. Bioelectron.</i><br>. 2013, <b>41</b> , 656–662          |
| anti-EGFR/AuNPs/MAPR/electrode                        | 5                                                  | This work                                                            |

**Table S1** Comparison of different cytosensors for detection of cancer cells.

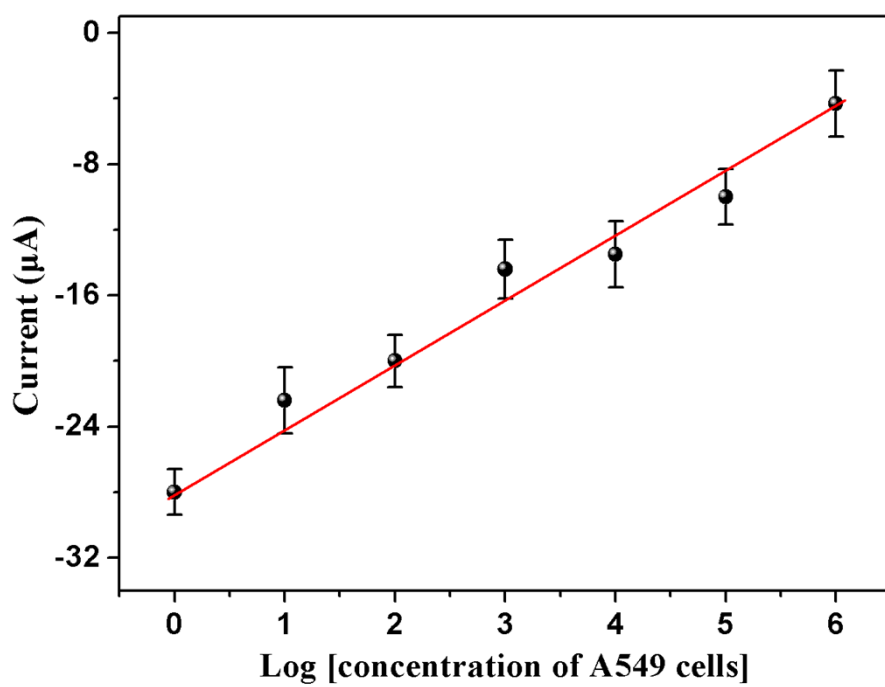

**Figure S2** The calibration plots of the changes of the SWV current response via the logarithm values of A549 cells concentrations in human serum samples.
